# Supplementary material for: The molecular prognostic score , a classifier for risk stratification of high-grade serous ovarian cancer
Source: Research Square preprint supplement (doi:10.21203/rs.3.rs-1560503/v1), 2022-04-20
Supplement: Supplementary file 1 [file 758e2944eb9c307fb23aa775.docx]

**Supplementary Tables: 5, 6, and 7**

| **Suppl Table 5: Conversion of FIGO stage to numeric value** | |
| --- | --- |
| Levels (FIG  O satge) | Numeric (FIGO stage) |
| IA | 1 |
| IB | 2 |
| IC | 3 |
| IIA | 4 |
| IIB | 5 |
| IIC | 6 |
| IIIA | 7 |
| IIIB | 8 |
| IIIC | 9 |
| IV | 10 |

| **Suppl Table 6: Conversion of size of Residual disease after cytoreductive surgery to numeric value** | |
| --- | --- |
| Levels (Residual disease) | Numeric (Residual disease) |
| No macroscopic disease | 1 |
| 1-10 mm | 2 |
| 11-20 mm | 3 |
| >20 mm | 4 |

| **Suppl Table 7: Conversion of Tumor grade to numeric value** | |
| --- | --- |
| Levels (Tumor grade) | Numeric (Residual disease) |
| G1 | 1 |
| G2 | 2 |
| G3 | 3 |
| G4 | 4 |
| Others | NA |
